# Supplementary material for: Enhancing the effects of transcranial magnetic stimulation with intravenously injected magnetic nanoparticles
Source: Royal Society of Chemistry journal article supplement (doi:10.1039/c9bm00178f), 2019-01-01
Supplement: c9bm00178f1.pdf [file c9bm00178f1.pdf]

Electronic Supplementary Material (ESI) for Biomaterials Science. This journal is © The Royal Society of Chemistry 2019

## Enhancing the effects of transcranial magnetic stimulation with intravenously injected magnetic nanoparticles

Rongrong Li, <sup>†,a</sup> Jun Wang, <sup>†,b</sup> Xiaoya Yu, <sup>b</sup> Pengfei Xu, <sup>a</sup> Shuai Zhang, <sup>c, d</sup> Jinhua Xu, <sup>b</sup> Yongjie Bai, <sup>c, e</sup> Zhengze Dai, <sup>c, f</sup> Yuxiang Sun, <sup>b</sup> Ruidong Ye, <sup>a</sup> Xinfeng Liu, <sup>a</sup> Gang Ruan, <sup>b,\*</sup> Gelin Xu, <sup>\*</sup>

### Supplementary Information

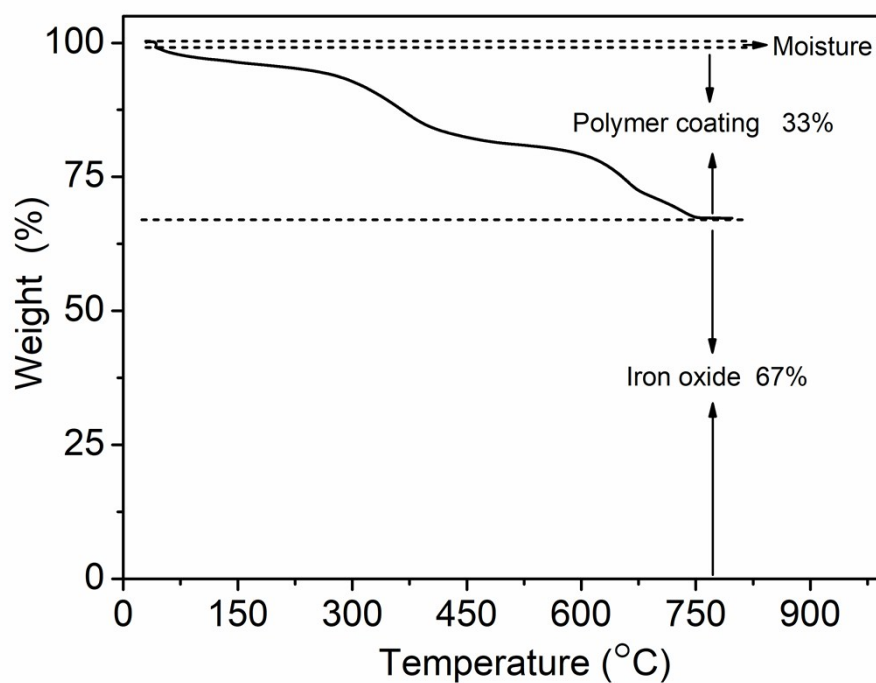

**Figure S1** Thermogravimetric analyses curve of SPIONs from 0 to 800 °C.

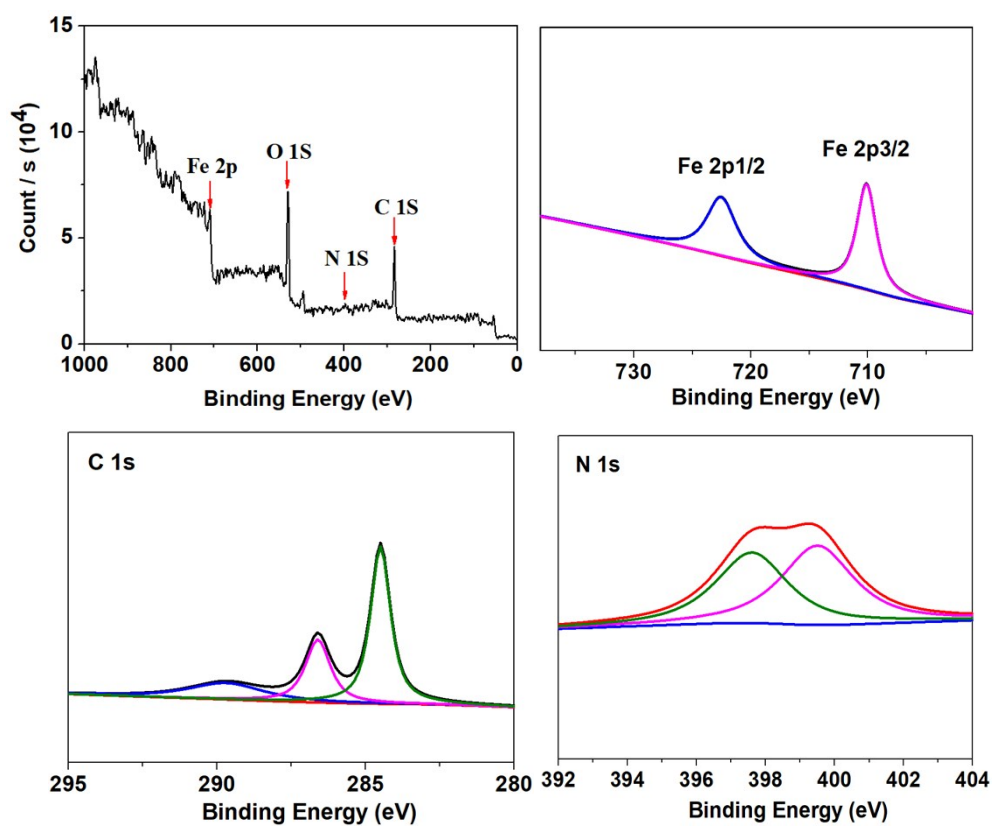

**Figure S2** XPS spectra of SPIONs (a), Fe 2p (b), C 1s (c), N 1s (d).
